# Supplementary material
Source: HighWire-hosted journal article supplement (https://heart.bmj.com/content/108/8/613)
Supplement: inline-supplementary-material-1 [file inline-supplementary-material-1.pdf]

Contents Supplementary Material

eMethods ..... 2

eResults ..... 4

eReferences..... 5

Appendix figure 1 ..... 6

Appendix figure 2a ..... 7

Appendix table 2b ..... 8

Appendix table 2c..... 9

Appendix table 1..... 10

Appendix table 2. .... 11

Appendix table 3. .... 12

Appendix table 4. .... 13

## eMethods

### *Stratified analyses*

First, we stratified by sex, age-groups (0-64, 65 – 74, 75 – 85, >85), and bleeding risk (HAS-BLED 0-2 and  $\geq 3$ ). Second, we stratified by concomitant antiplatelet and concomitant NSAID use. Third, we stratified by the individual NOACs apixaban, dabigatran, and rivaroxaban (edoxaban was not considered due to the very small sample size). We included an interaction term in our models and used the likelihood ratio test to test whether the interaction terms were significant. As it is not possible to pool results from different likelihood ratio tests through a meta-analysis, we considered a subgroup as an effect-modifier if the likelihood ratio test was significant in two or more databases. In each subgroup, we calculated the number needed to treat for one year (NNTY), by taking the multiplicative inverse of the absolute risk reduction. The absolute risk reduction was estimated with the incidence rate from the untreated group and the adjusted IRR.

### *Sensitivity analyses*

We conducted several sensitivity analyses to test the robustness of our findings. First, we calculated E-values to identify the minimum strength of association that an unmeasured confounder would need to have with both PPI use and UGIB, conditional on the measured confounders, to explain away the observed associations <sup>1</sup>. Second, we tested the association between PPI use and non-GI major bleeds. As PPI use should not affect the risk for those bleeds, they could serve as falsification endpoints and we could assess potential residual confounding <sup>2</sup>. Third, we assessed how the results would be affected by including information on primary care diagnostic data by assessing the association between PPI use and UGIB in the Stockholm healthcare database with and without restricting the analyses to only secondary care data. Fourth, we conducted an analysis in which we had a maximum follow-up of one year. Fifth, we conducted an analysis in which we kept all covariates fixed at baseline. Finally, we conducted an analysis in which we excluded all patients suffering from the outcome of interest in the year prior to inclusion to remove high risk patients and an analysis where we excluded all patients suffering from any bleed or anemia in the year prior to inclusion.

To assess for each covariate how it influenced the exposure-outcome association, and thus what the effect of confounding adjustment is per covariate, we performed an additional analysis in which we created several adjusted Poisson regression models (i.e., without taking IPW into account). In these models we first: added each aforementioned covariate univariately, but still time-dependently; second: added groups of covariates (i.e., age-sex, CHADsVASc- and HAS-BLED comorbidities, GI comorbidities, comedication), and third: performed a full time-dependent covariate adjusted Poisson regression model.

## eResults

The E-value for the point estimate for UGIB was 2.01. This indicates that a potential unobserved confounder would have required a relative risk of 2.01 with both the outcome and PPI use to move the point estimate to neutral.

We found a neutral association between PPI use and the first falsification endpoint of non-GI major bleed (IRR: 1.04; CI: 0.89 – 1.23). Censoring patients after one year of follow-up yielded similar results as in the main analysis (IRR: 0.72; CI: 0.54 – 0.96), as did excluding patients with a UGIB in the year prior to inclusion (IRR: 0.76; CI: 0.60 – 0.97) and exclusion of patients with any bleed or anemia in the year prior to the event (IRR: 0.78; CI 0.60 – 1.01). Keeping the covariates fixed at baseline yielded no different results (IRR: 0.81; CI 0.64 – 1.03).

Baseline characteristics were comparable to those observed in the main analysis when analyzing only secondary care data (Appendix Table 3). We found comparable results when we used only data from secondary care in Stockholm (IRR: 0.67; CI: 0.34 – 1.20), compared to data from both primary and secondary care (IRR: 0.79; CI: 0.49 – 1.26).

The stepwise adjusted models showed that anemia had the largest univariate effect when adjusting the models, followed by vascular disease and diuretics, and all three moved the point estimate towards a protective effect (Appendix Table 4). All groups of covariates were effective in removing confounding, but no group was as effective as the fully adjusted model and the full IPW model, indicating that adjustment for all covariates was needed. The fully adjusted models showed a larger protective effect compared to the IPW model.

**eReferences**

1. Weele TJ Van Der, Ding P. Sensitivity analysis in observational research: Introducing the E-Value. *Ann Intern Med* American College of Physicians; 2017;**167**:268–274.
2. Prasad V, Jena AB. Prespecified Falsification End Points. *JAMA* American Medical Association; 2013;**309**:241.

## Appendix figure 1

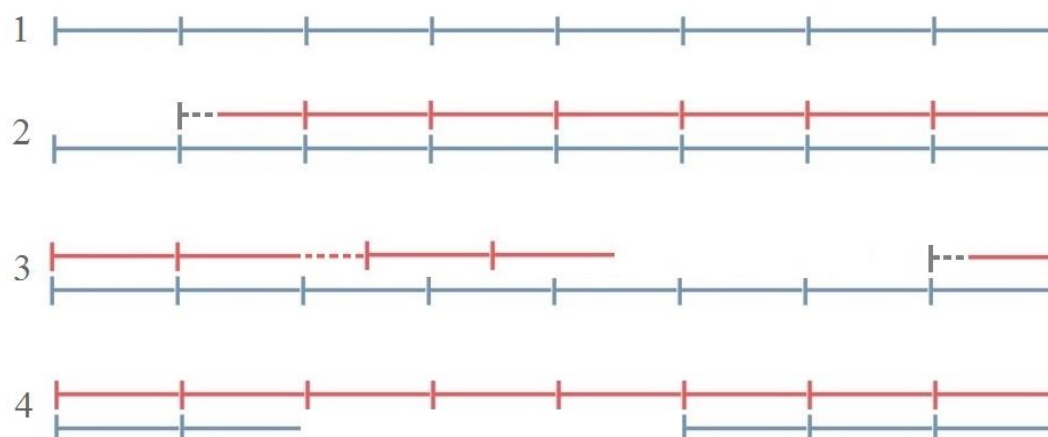

Graphical presentation of four hypothetical patients with different exposure patterns. The vertical lines indicate that a patient claims a prescription and the horizontal lines indicate the duration of a prescription. A blue line is for a NOAC prescription and a red line is for a PPI prescription.

- Patient 1 is exposed to a NOAC the whole period and is therefore in the cohort the whole time, without any PPI exposure.
- Patient 2 claims a PPI prescription in the second period, and after a wash-in of 7 days (the grey area), the patient is considered exposed to a PPI the rest of the study period.
- Patient 3 is taking a PPI from the beginning of the study and is considered exposed to a PPI from the start. After the second PPI prescription, the patient claims a new PPI prescription after the calculated end of the second prescription, but within the 30-day grace period for non-compliance and, therefore, the patient is considered exposed to PPI treatment during that whole period. After the fourth PPI prescription, the patient fails to claim a new prescription within the 30-day grace period and is therefore considered unexposed from the end of the calculated end of the fourth prescription. At the end the patient claims a new PPI prescription and after a wash-in of 7 days the patient is considered exposed to PPI treatment.
- Patient 4 is taking a PPI from the beginning of the study and is considered exposed to a PPI from the start. After the second NOAC prescription, the patient fails to claim a new NOAC prescription within the 30-day grace period and, therefore, the patient is removed from the cohort during that period. After the patient claims a new NOAC prescription, the patient is once again included in the cohort.

Appendix figure 2a

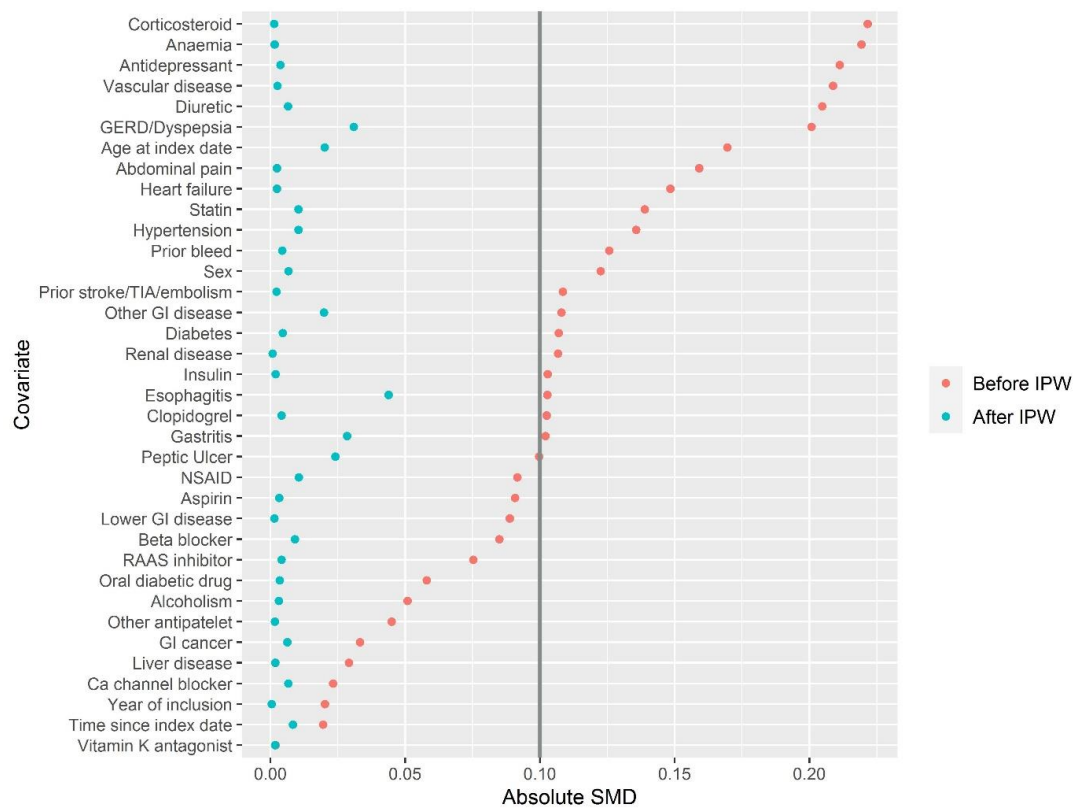

Standardized mean differences of covariates before and after applying inverse probability weighting in the Stockholm database.

Appendix table 2b

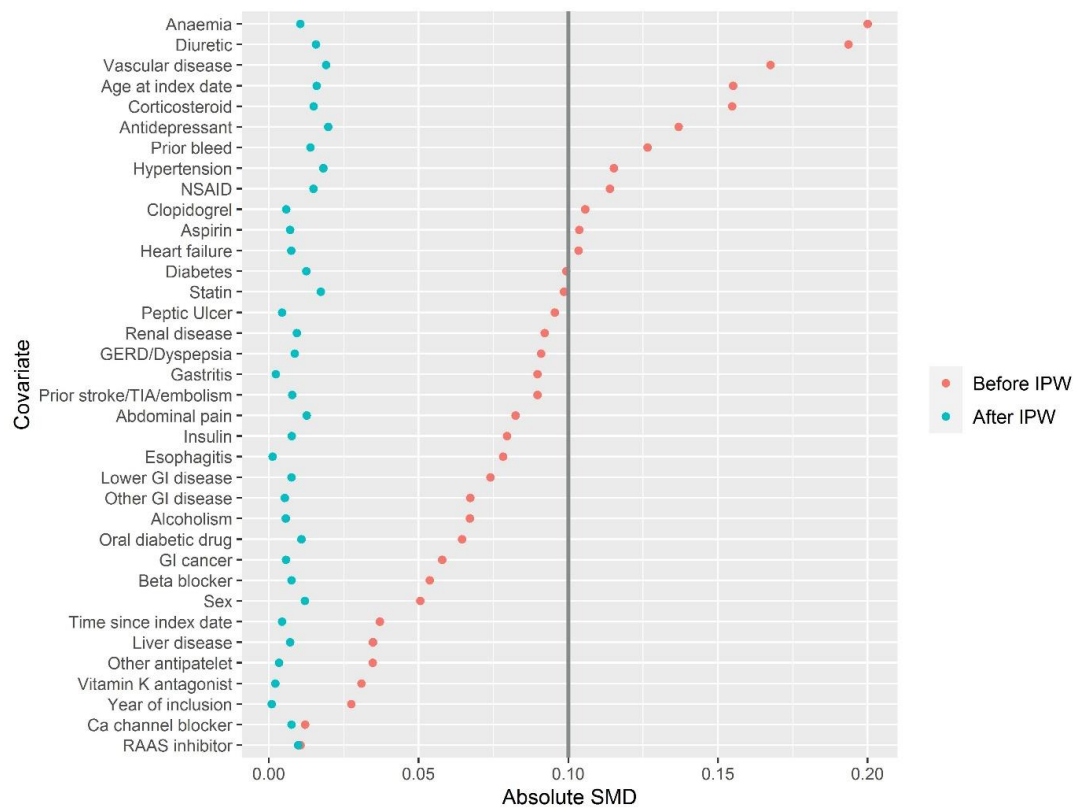

Standardized mean differences of covariates before and after applying inverse probability weighting in the Denmark database.



Appendix table 2c

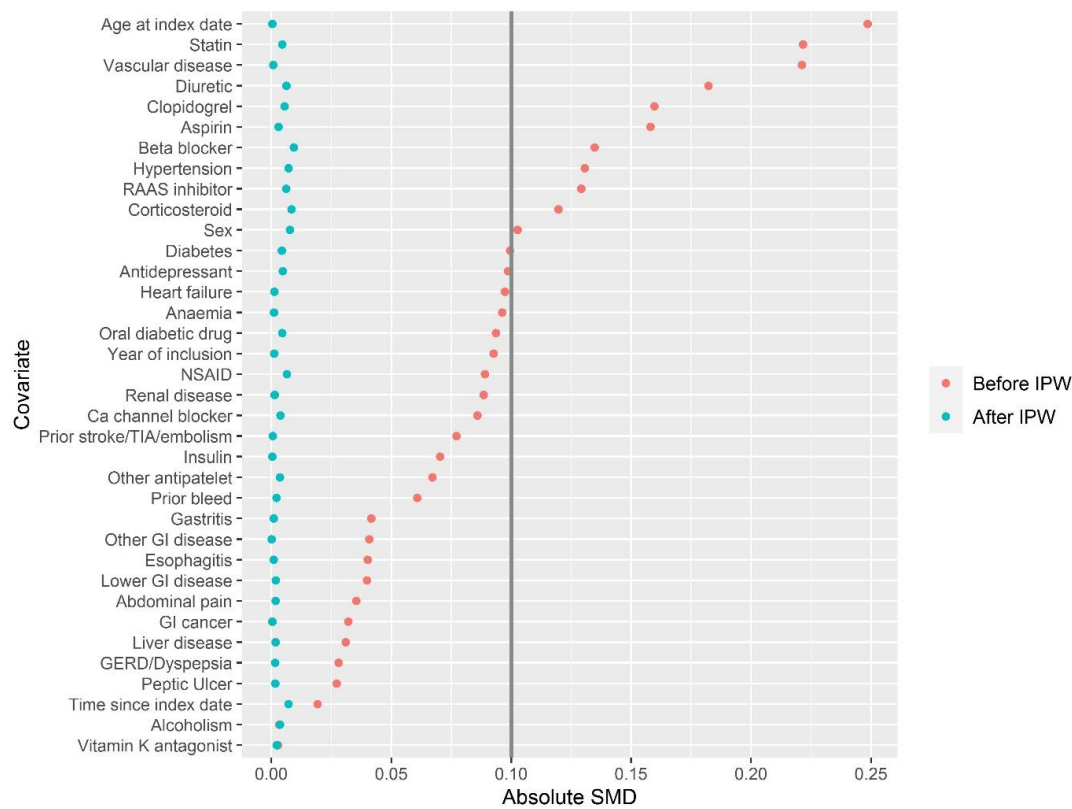

Standardized mean differences of covariates before and after applying inverse probability weighting in the PHARMO database.

Appendix table 1

| Outcome definition     | ICD-code beginning with                                                                                                                                                                                     |
|------------------------|-------------------------------------------------------------------------------------------------------------------------------------------------------------------------------------------------------------|
| Upper GI bleed         | K25-K28 (sub codes 0, 2, 4, and 6 only) K290, K228, K298, I864                                                                                                                                              |
| Baseline comorbidities | ICD-code beginning with                                                                                                                                                                                     |
| Hypertension           | I10-I16                                                                                                                                                                                                     |
| Renal disease          | N183, N184, N185, N189, E102, E112, E122, E132, E142, I12, N03, N083, N085, N118C, N14, N150, N16, N19, N26, P960, Q601, Q602, Z992                                                                         |
| Liver disease          | K70-77                                                                                                                                                                                                      |
| Stroke/TIA/embolism    | I63, I64, I679, I693, I694, I698, I69, G453, G458, G459, I74, I26, I80, I81, I82                                                                                                                            |
| Prior bleed            | I60, I61, I62, S064, S065, S066, I850, I983, K25-K28 (sub codes 0, 2, 4, and 6 only) K290, K228, K298, I864, K625, K922, D62, S063C, K920, G951A, I312, J942, K638B, K638C, K661, K868G, N02, R04, R31, R58 |
| Anaemia                | D50-59, D60-64                                                                                                                                                                                              |
| Alcohol abuse          | E244, F10, G312, G621, G721, I426, K292, K70, K860, O354, P043, T51, Y90, Y91, Y91, Z502, Z714, E529A                                                                                                       |
| Heart failure          | I50, I099A, I971A, O754C, O291A, O742A, O754D, O891A, I30, Z035EA                                                                                                                                           |
| Vascular disease       | I20, I21, I22, I23, I24, I25, I70, I739                                                                                                                                                                     |
| Diabetes               | E10, E11, E12, E13, E14, G590, G632, H280, H360, N083, O240, O241, O242, O243                                                                                                                               |
| Peptic ulcer           | K25-K28 (sub codes 1, 3, 5, 7, and 9 only)                                                                                                                                                                  |
| GI cancer              | C15-26                                                                                                                                                                                                      |
| Gastritis              | K29                                                                                                                                                                                                         |
| Esophagitis            | K20, K220, K2210, K222-229                                                                                                                                                                                  |
| GERD/dyspepsia         | K21, K30                                                                                                                                                                                                    |
| Abdominal pain         | R10, R12                                                                                                                                                                                                    |
| Lower GI problems      | K57, K60-64                                                                                                                                                                                                 |
| Other GI problems      | K31, R11                                                                                                                                                                                                    |
| Medication             | ATC code beginning with                                                                                                                                                                                     |
| Apixaban               | B01AF02                                                                                                                                                                                                     |
| Dabigatran             | B01AE07                                                                                                                                                                                                     |
| Rivaroxaban            | B01AF01                                                                                                                                                                                                     |
| Edoxaban               | B01AF03                                                                                                                                                                                                     |
| PPI                    | A02BC                                                                                                                                                                                                       |
| Aspirin                | B01AC06                                                                                                                                                                                                     |
| NSAID                  | M01A                                                                                                                                                                                                        |
| Clopidogrel            | B01AC04                                                                                                                                                                                                     |
| Other antiplatelet     | B01AC22, B01AC24, B01AC07                                                                                                                                                                                   |
| Corticosteroids        | H02AA01, H02AA02, H02AA03, H02AB                                                                                                                                                                            |
| Diuretic               | C03A, C03B, C03C, C03D, C03E                                                                                                                                                                                |
| Beta blocker           | C07A, C07B, C07C, C07D, C07E, C07F                                                                                                                                                                          |
| Ca channel blocker     | C08C, C08D, C08E, C08G                                                                                                                                                                                      |
| RAAS inhibitor         | C09A, C09B, C09C, C09D, C09X                                                                                                                                                                                |
| Statin                 | C10AA                                                                                                                                                                                                       |
| Oral antidiabetic drug | A10B                                                                                                                                                                                                        |
| Insulin                | A10A                                                                                                                                                                                                        |
| Antidepressant         | N06A                                                                                                                                                                                                        |
| Falsification endpoint | ICD code beginning with                                                                                                                                                                                     |
| Non GI major bleed     | I60, I61, I62, S064, S065, J942, I312, H431, H351                                                                                                                                                           |

ATC and ICD-10 codes

Appendix table 2.

|                              | Stockholm       |               | Denmark            |               | PHARMO          |               |
|------------------------------|-----------------|---------------|--------------------|---------------|-----------------|---------------|
|                              | Total (N=34977) |               | Total (N = 108322) |               | Total (N=19034) |               |
|                              | PPI user        | PPI non-user  | PPI user           | PPI non-user  | PPI user        | PPI non-user  |
| n                            | 11 682          | 23 349        | 26 220             | 84 005        | 8 806           | 10 228        |
| Person time (years)          | 9993            | 45586         | 21762              | 169226        | 8183            | 17820         |
| <b>Age, sex, risk scores</b> |                 |               |                    |               |                 |               |
| Female                       | 5771 (49.6%)    | 10028 (42.9%) | 12323 (47.0%)      | 36962 (44.0%) | 3954 (44.9%)    | 4146 (40.5%)  |
| Age                          | 75.31 (10.36)   | 74.30 (11.07) | 75.83 (10.19)      | 74.50 (11.11) | 73.26 (10.11)   | 70.97 (10.96) |
| CHADsVASc (mean (sd))        | 3.77 (1.84)     | 3.29 (1.78)   | 3.22 (1.68)        | 2.83 (1.66)   | 2.85 (1.66)     | 2.37 (1.63)   |
| HAS-BLED (mean(sd))          | 2.55 (1.22)     | 2.16 (1.14)   | 2.19 (1.16)        | 1.86 (1.12)   | 1.89 (1.12)     | 1.52 (1.09)   |
| ≥1 GI comorbidity, n (%)     | 2330 (20.0%)    | 1951 (8.4%)   | 2944 (11.2%)       | 5159 (6.1%)   | 562 (6.4%)      | 450 (4.4%)    |
| <b>NOAC</b>                  |                 |               |                    |               |                 |               |
| Apixaban                     | 7154 (61.5%)    | 15876 (68.0%) | 8299 (31.7%)       | 28439 (33.9%) | 2072 (23.5%)    | 2548 (24.9%)  |
| Dabigatran                   | 2526 (21.7%)    | 3930 (16.8%)  | 9154 (34.9%)       | 23957 (28.5%) | 3673 (41.7%)    | 3711 (36.3%)  |
| Rivaroxaban                  | 1929 (16.6%)    | 3486 (14.9%)  | 8506 (32.4%)       | 30295 (36.1%) | 2649 (30.1%)    | 3362 (32.9%)  |
| Edoxaban                     | 19 (0.2%)       | 57 (0.2%)     | 261 (1.0%)         | 1314 (1.6%)   | 412 (4.7%)      | 607 (5.9%)    |
| <b>Main comorbidities</b>    |                 |               |                    |               |                 |               |
| Hypertension                 | 7966 (68.5%)    | 14393 (61.6%) | 9558 (36.5%)       | 25212 (30.0%) | 2912 (33.1%)    | 2737 (26.8%)  |
| Renal disease                | 906 (7.8%)      | 1135 (4.9%)   | 1142 (4.4%)        | 2460 (2.9%)   | 610 (6.9%)      | 522 (5.1%)    |
| Liver disease                | 140 (1.2%)      | 189 (0.8%)    | 268 (1.0%)         | 580 (0.7%)    | 148 (1.7%)      | 124 (1.2%)    |
| Prior stroke/TIA/embolism    | 2624 (22.6%)    | 4270 (18.3%)  | 5408 (20.6%)       | 14471 (17.2%) | 1023 (11.6%)    | 994 (9.7%)    |
| Alcoholism                   | 368 (3.2%)      | 601 (2.6%)    | 677 (2.6%)         | 1423 (1.7%)   | 112 (1.3%)      | 127 (1.2%)    |
| Prior bleed                  | 1692 (14.6%)    | 2316 (9.9%)   | 3190 (12.2%)       | 6691 (8.0%)   | 410 (4.7%)      | 335 (3.3%)    |
| Anaemia                      | 1791 (15.4%)    | 1699 (7.3%)   | 2426 (9.3%)        | 3539 (4.2%)   | 720 (8.2%)      | 548 (5.4%)    |
| Heart failure                | 3065 (26.4%)    | 4850 (20.8%)  | 4351 (16.6%)       | 11131 (13.3%) | 1221 (13.9%)    | 1121 (11.0%)  |
| Vascular disease             | 3031 (26.1%)    | 3755 (16.1%)  | 6228 (23.8%)       | 14048 (16.7%) | 2188 (24.8%)    | 1459 (14.3%)  |
| Diabetes                     | 2414 (20.8%)    | 3895 (16.7%)  | 3459 (13.2%)       | 8566 (10.2%)  | 1362 (15.5%)    | 1237 (12.1%)  |
| <b>GI comorbidities</b>      |                 |               |                    |               |                 |               |
| Peptic ulcer                 | 189 (1.6%)      | 42 (0.2%)     | 309 (1.2%)         | 191 (0.2%)    | 13 (0.1%)       | 3 (0.0%)      |
| Gastrointestinal cancer      | 124 (1.1%)      | 149 (0.6%)    | 414 (1.6%)         | 765 (0.9%)    | 141 (1.6%)      | 109 (1.1%)    |
| Gastritis                    | 199 (1.7%)      | 72 (0.3%)     | 294 (1.1%)         | 265 (0.3%)    | 41 (0.5%)       | 16 (0.2%)     |
| Esophagitis                  | 136 (1.2%)      | 37 (0.2%)     | 227 (0.9%)         | 221 (0.3%)    | 36 (0.4%)       | 26 (0.3%)     |
| GERD/dyspepsia               | 530 (4.6%)      | 188 (0.8%)    | 370 (1.4%)         | 495 (0.6%)    | 40 (0.5%)       | 16 (0.2%)     |
| Abdominal pain               | 1028 (8.8%)     | 881 (3.8%)    | 857 (3.3%)         | 1868 (2.2%)   | 92 (1.0%)       | 77 (0.8%)     |
| Lower GI problems            | 611 (5.3%)      | 681 (2.9%)    | 949 (3.6%)         | 2019 (2.4%)   | 193 (2.2%)      | 183 (1.8%)    |
| Other GI problems            | 276 (2.4%)      | 184 (0.8%)    | 242 (0.9%)         | 402 (0.5%)    | 104 (1.2%)      | 81 (0.8%)     |
| <b>Comedication</b>          |                 |               |                    |               |                 |               |
| Aspirin                      | 3837 (33.0%)    | 5892 (25.2%)  | 8748 (33.4%)       | 22930 (27.3%) | 2448 (27.8%)    | 1680 (16.4%)  |
| Vitamin K antagonist         | 1978 (17.0%)    | 2438 (10.4%)  | 6525 (24.9%)       | 19625 (23.4%) | 2371 (26.9%)    | 2984 (29.2%)  |
| Clopidogrel                  | 560 (4.8%)      | 600 (2.6%)    | 2536 (9.7%)        | 6816 (8.1%)   | 734 (8.3%)      | 531 (5.2%)    |
| Other antiplatelets          | 241 (2.1%)      | 253 (1.1%)    | 773 (2.9%)         | 1614 (1.9%)   | 348 (4.0%)      | 189 (1.8%)    |
| NSAID                        | 1380 (11.9%)    | 1737 (7.4%)   | 4467 (17.0%)       | 9975 (11.9%)  | 1164 (13.2%)    | 939 (9.2%)    |
| Corticosteroid               | 1708 (14.7%)    | 1375 (5.9%)   | 3207 (12.2%)       | 6364 (7.6%)   | 1237 (14.0%)    | 983 (9.6%)    |
| Diuretic                     | 3663 (31.5%)    | 5492 (23.5%)  | 11557 (44.1%)      | 30465 (36.3%) | 2904 (33.0%)    | 2624 (25.7%)  |
| Beta blocker                 | 7302 (62.8%)    | 13445 (57.6%) | 12591 (48.0%)      | 36831 (43.8%) | 5166 (58.7%)    | 5395 (52.7%)  |
| Calcium channel blocker      | 3089 (26.6%)    | 5932 (25.4%)  | 7425 (28.3%)       | 21921 (26.1%) | 2196 (24.9%)    | 2163 (21.1%)  |
| RAAS inhibitor               | 5312 (45.7%)    | 9599 (41.1%)  | 12466 (47.5%)      | 37509 (44.7%) | 4522 (51.4%)    | 4425 (43.3%)  |
| Statin                       | 4161 (35.8%)    | 6864 (29.4%)  | 10788 (41.1%)      | 30781 (36.6%) | 4139 (47.0%)    | 3676 (35.9%)  |
| Diabetic drug                | 1199 (10.3%)    | 2036 (8.7%)   | 3641 (13.9%)       | 9917 (11.8%)  | 1394 (15.8%)    | 1256 (12.3%)  |
| Insulin                      | 806 (6.9%)      | 1089 (4.7%)   | 1280 (4.9%)        | 3225 (3.8%)   | 481 (5.5%)      | 451 (4.4%)    |
| Antidepressant               | 1978 (17.0%)    | 2438 (10.4%)  | 4147 (15.8%)       | 10768 (12.8%) | 783 (8.9%)      | 657 (6.4%)    |

Full baseline characteristics per database

Appendix table 3.

|                           | Primary + Secondary | Secondary only |
|---------------------------|---------------------|----------------|
| <b>Characteristic</b>     |                     |                |
| Female                    | 15799 (45.2%)       | 12472 (46.6%)  |
| Age                       | 74.64 (10.85)       | 75.50 (11.05)  |
| CHADsVASc (mean (sd))     | 3.45 (1.81)         | 3.25 (1.82)    |
| HAS-BLED (mean(sd))       | 2.29 (1.18)         | 2.02 (1.15)    |
| ≥1 GI comorbidity         | 4281 (12.2%)        | 2302 (8.6%)    |
| <b>NOAC</b>               |                     |                |
| Apixaban                  | 23030 (65.8%)       | 17335 (64.8%)  |
| Dabigatran                | 6456 (18.5%)        | 5197 (19.4%)   |
| Rivaroxaban               | 5415 (15.5%)        | 4156 (15.5%)   |
| Edoxaban                  | 76 (0.2%)           | 58 (0.2%)      |
| <b>Comorbidities</b>      |                     |                |
| Hypertension              | 22359 (63.9%)       | 12864 (48.1%)  |
| Renal disease             | 2041 (5.8%)         | 1312 (4.9%)    |
| Liver disease             | 329 (0.9%)          | 166 (0.6%)     |
| Prior stroke/TIA/embolism | 6894 (19.7%)        | 4776 (17.9%)   |
| Alcoholism                | 969 (2.8%)          | 552 (2.1%)     |
| Prior bleed               | 4008 (11.5%)        | 1921 (7.2%)    |
| Anaemia                   | 3490 (10.0%)        | 2035 (7.6%)    |
| Heart failure             | 7915 (22.6%)        | 6100 (22.8%)   |
| Vascular disease          | 6786 (19.4%)        | 4503 (16.8%)   |
| Diabetes                  | 6309 (18.0%)        | 3808 (14.2%)   |
| <b>GI comorbidities</b>   |                     |                |
| Peptic ulcer              | 231 (0.7%)          | 159 (0.6%)     |
| Gastrointestinal cancer   | 273 (0.8%)          | 190 (0.7%)     |
| Gastritis                 | 271 (0.8%)          | 91 (0.3%)      |
| Esophagitis               | 173 (0.5%)          | 84 (0.3%)      |
| GERD/dyspepsia            | 718 (2.1%)          | 125 (0.5%)     |
| Abdominal pain            | 1909 (5.5%)         | 212 (0.8%)     |
| Lower GI problems         | 1292 (3.7%)         | 395 (1.5%)     |
| Other GI problems         | 460 (1.3%)          | 130 (0.5%)     |
| <b>Comedication</b>       |                     |                |
| Aspirin                   | 9729 (27.8%)        | 6783 (25.4%)   |
| Vitamin K antagonist      | 4416 (12.6%)        | 3302 (12.3%)   |
| Clopidogrel               | 1160 (3.3%)         | 822 (3.1%)     |
| Other antiplatelets       | 494 (1.4%)          | 330 (1.2%)     |
| NSAID                     | 3117 (8.9%)         | 2150 (8.0%)    |
| Corticosteroid            | 3083 (8.8%)         | 2647 (9.9%)    |
| Diuretic                  | 9155 (26.2%)        | 8157 (30.5%)   |
| Beta blocker              | 20747 (59.3%)       | 17015 (63.6%)  |
| Calcium channel blocker   | 9021 (25.8%)        | 6643 (24.8%)   |
| RAAS inhibitor            | 14911 (42.6%)       | 11966 (44.7%)  |
| Statin                    | 11025 (31.5%)       | 8638 (32.3%)   |
| Diabetic drug             | 3235 (9.2%)         | 2522 (9.4%)    |
| Insulin                   | 1895 (5.4%)         | 1655 (6.2%)    |
| Antidepressant            | 4416 (12.6%)        | 3823 (14.3%)   |

Baseline characteristics of the Stockholm cohort with and without access to primary care data

Appendix table 4.

|                                     | Stockholm               | Denmark                 | PHARMO                  | Pooled                  |
|-------------------------------------|-------------------------|-------------------------|-------------------------|-------------------------|
| Model                               | IRR                     | IRR                     | IRR                     | IRR                     |
| <b>Main analysis (IPW)</b>          | <b>0,79 (0,48-1,23)</b> | <b>0,72 (0,53-0,96)</b> | <b>0,85 (0,37-1,78)</b> | <b>0,75 (0,59-0,95)</b> |
| <b>Full covariate adjustment</b>    | <b>0,72 (0,45-1,13)</b> | <b>0,67 (0,52-0,86)</b> | <b>0,74 (0,30-1,66)</b> | <b>0,69 (0,56-0,85)</b> |
| <b>Unadjusted</b>                   | <b>1,21 (0,77-1,82)</b> | <b>1,02 (0,79-1,28)</b> | <b>1,03 (0,44-2,22)</b> | <b>1,06 (0,86-1,30)</b> |
| <b>Age sex adjusted</b>             | <b>1,12 (0,72-1,82)</b> | <b>0,96 (0,74-1,27)</b> | <b>0,99 (0,42-2,23)</b> | <b>0,99 (0,81-1,29)</b> |
| Age                                 | 1,11 (0,71-1,67)        | 0,95 (0,74-1,20)        | 0,97 (0,41-2,10)        | 0,99 (0,81-1,21)        |
| Sex                                 | 1,21 (0,77-1,82)        | 1,02 (0,79-1,29)        | 1,06 (0,46-2,29)        | 1,06 (0,87-1,30)        |
| <b>HASBLED CHADSVASC adjustment</b> | <b>0,98 (0,62-1,49)</b> | <b>0,83 (0,64-1,05)</b> | <b>0,89 (0,38-1,94)</b> | <b>0,86 (0,70-1,06)</b> |
| Hypertension                        | 1,17 (0,75-1,77)        | 0,99 (0,78-1,26)        | 0,99 (0,43-2,14)        | 1,03 (0,84-1,27)        |
| Renal disease                       | 1,15 (0,74-1,73)        | 1,02 (0,79-1,28)        | 1,04 (0,45-2,24)        | 1,05 (0,85-1,28)        |
| Liver disease                       | 1,21 (0,78-1,82)        | 1,00 (0,78-1,27)        | 1,04 (0,45-2,23)        | 1,05 (0,86-1,29)        |
| Stroke/TIA/Embolism                 | 1,15 (0,74-1,73)        | 1,00 (0,78-1,27)        | 1,03 (0,44-2,21)        | 1,03 (0,84-1,27)        |
| Alcoholism                          | 1,18 (0,76-1,78)        | 0,99 (0,77-1,25)        | 1,03 (0,44-2,22)        | 1,03 (0,84-1,26)        |
| Prior bleed                         | 1,14 (0,73-1,71)        | 1,00 (0,78-1,26)        | 0,99 (0,43-2,14)        | 1,03 (0,84-1,26)        |
| Anaemia                             | 1,02 (0,65-1,55)        | 0,91 (0,71-1,16)        | 0,89 (0,38-1,94)        | 0,94 (0,76-1,15)        |
| Heart failure                       | 1,11 (0,71-1,68)        | 0,98 (0,77-1,24)        | 1,00 (0,43-2,15)        | 1,01 (0,83-1,24)        |
| Vascular disease                    | 1,11 (0,71-1,67)        | 0,97 (0,75-1,22)        | 0,91 (0,39-1,98)        | 0,99 (0,81-1,22)        |
| Diabetes                            | 1,19 (0,76-1,79)        | 0,99 (0,77-1,25)        | 0,98 (0,42-2,11)        | 1,03 (0,84-1,27)        |
| <b>GI covariate adjustment</b>      | <b>1,08 (0,68-1,65)</b> | <b>0,94 (0,73-1,19)</b> | <b>0,94 (0,40-2,05)</b> | <b>0,97 (0,78-1,19)</b> |
| Peptic ulcer                        | 1,14 (0,73-1,73)        | 0,98 (0,76-1,24)        | 1,03 (0,44-2,22)        | 1,02 (0,83-1,25)        |
| GI cancer                           | 1,21 (0,77-1,82)        | 1,00 (0,78-1,27)        | 1,04 (0,45-2,23)        | 1,05 (0,86-1,29)        |
| Gastritis                           | 1,19 (0,76-1,79)        | 1,01 (0,79-1,28)        | 0,99 (0,42-2,14)        | 1,05 (0,86-1,29)        |
| Esophagitis                         | 1,11 (0,71-1,69)        | 0,99 (0,77-1,25)        | 0,99 (0,42-2,14)        | 1,02 (0,83-1,25)        |
| GERD/Dyspepsia                      | 1,18 (0,76-1,79)        | 1,02 (0,79-1,28)        | 1,00 (0,43-2,15)        | 1,05 (0,86-1,29)        |
| Abdominal pain                      | 1,24 (0,79-1,86)        | 1,00 (0,78-1,26)        | 1,04 (0,45-2,23)        | 1,05 (0,86-1,29)        |
| Lower GI disease                    | 1,18 (0,76-1,78)        | 1,01 (0,79-1,27)        | 1,03 (0,44-2,21)        | 1,05 (0,85-1,28)        |
| Other GI disease                    | 1,22 (0,78-1,83)        | 1,00 (0,78-1,27)        | 1,04 (0,45-2,23)        | 1,05 (0,86-1,29)        |
| <b>Full drug adjustment</b>         | <b>0,98 (0,62-1,49)</b> | <b>0,83 (0,64-1,05)</b> | <b>0,89 (0,38-1,94)</b> | <b>0,86 (0,70-1,06)</b> |
| Aspirin                             | 1,15 (0,74-1,74)        | 0,96 (0,75-1,21)        | 1,00 (0,43-2,17)        | 1,00 (0,82-1,23)        |
| NSAID                               | 1,20 (0,77-1,81)        | 0,99 (0,77-1,25)        | 1,01 (0,43-2,16)        | 1,03 (0,84-1,27)        |
| Clopidogrel                         | 1,18 (0,75-1,78)        | 0,98 (0,77-1,24)        | 1,08 (0,47-2,33)        | 1,03 (0,84-1,26)        |
| Other antiplatelets                 | 1,21 (0,78-1,83)        | 1,00 (0,78-1,27)        | 1,04 (0,45-2,24)        | 1,05 (0,86-1,29)        |
| Corticosteroids                     | 1,23 (0,79-1,86)        | 0,97 (0,76-1,23)        | 1,03 (0,44-2,22)        | 1,03 (0,84-1,26)        |
| Diuretics                           | 1,10 (0,70-1,65)        | 0,94 (0,73-1,18)        | 0,93 (0,40-2,01)        | 0,97 (0,79-1,19)        |
| Beta blocker                        | 1,21 (0,78-1,83)        | 1,02 (0,80-1,29)        | 1,05 (0,45-2,26)        | 1,06 (0,87-1,30)        |
| Ca channel blocker                  | 1,20 (0,77-1,81)        | 1,02 (0,79-1,28)        | 1,00 (0,43-2,16)        | 1,05 (0,86-1,29)        |
| RAAS inhibitor                      | 1,19 (0,76-1,79)        | 0,98 (0,76-1,24)        | 0,99 (0,42-2,13)        | 1,03 (0,84-1,26)        |
| Statin                              | 1,19 (0,76-1,79)        | 1,02 (0,80-1,29)        | 1,03 (0,44-2,23)        | 1,06 (0,86-1,30)        |
| Oral diabetic drug                  | 1,21 (0,77-1,82)        | 1,01 (0,79-1,27)        | 0,96 (0,41-2,07)        | 1,05 (0,85-1,28)        |
| Insulin                             | 1,13 (0,73-1,71)        | 1,01 (0,78-1,27)        | 1,02 (0,44-2,20)        | 1,04 (0,84-1,27)        |
| Antidepressant                      | 1,13 (0,72-1,70)        | 1,00 (0,78-1,26)        | 0,99 (0,43-2,15)        | 1,02 (0,84-1,26)        |
| Vitamin K antagonist                | 1,21 (0,77-1,82)        | 1,01 (0,79-1,27)        | 1,03 (0,44-2,22)        | 1,05 (0,86-1,29)        |

Effect of adjustment on association per covariate or set of covariates. First three columns are for the databases separately, and the final column is for the pooled analysis.
